# Supplementary material for: Raman spectroscopy detects metabolic signatures of radiation response and hypoxic fluctuations in non-small cell lung cancer
Source: BMC Cancer. 2019 May 20;19:474. doi: 10.1186/s12885-019-5686-1 (PMC6528330; doi:10.1186/s12885-019-5686-1)
Supplement: Supplementary file 1 — Table S1. Raman peak assignment for radiation induced principal component 1 (PC1). Table S2. Raman peak assignment for principal component 2 (PC2). Figure S1. Mean Raman spectrum obtained for unirradiated and irradiated tumours harvested at 2 hours and 3 days post treatment. Figure S2. PC2 score in relation to tumour regression. Figure S3. No correlation between PC2 score and CAIX IF intensity. (ZIP 2231 kb) [file 12885_2019_5686_MOESM1_ESM.zip › Suppl_FigureS2R3.pdf]

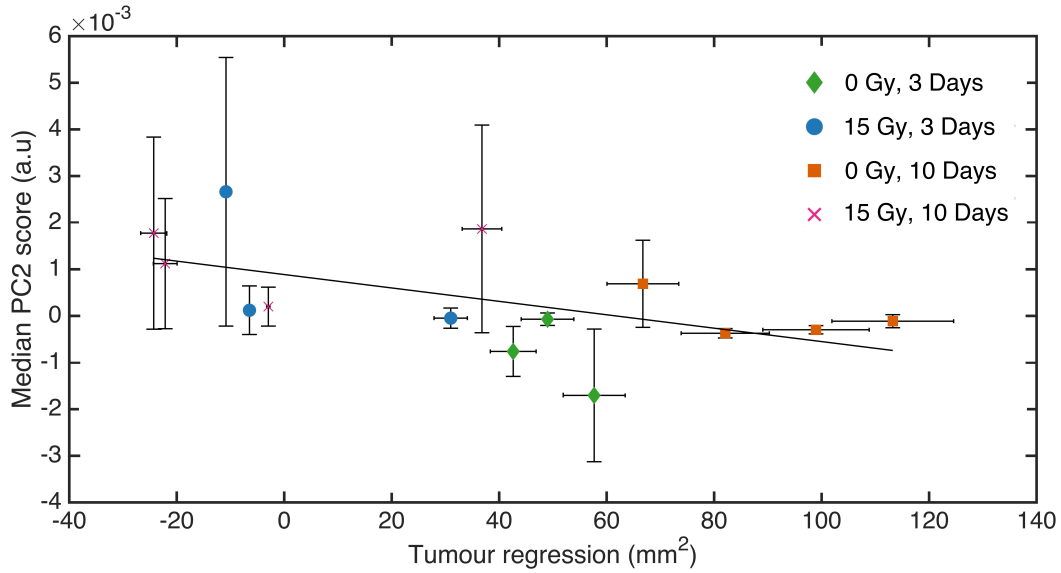

**Figure S.2 PC2 score in relation to tumour regression.** Median PC2 score as determined using RS is shown as a function of change in tumour area as measured from time of treatment to time of euthanasia. This is plotted for 0 Gy and 15 Gy irradiated tumours harvested at 3 and 10 days. Error bars represent 95% confidence interval on the median PC2 score, and an estimated measurement uncertainty of 10% on tumour area. No statistically significant correlation is observed between PC2 score and tumour regression ( $R^2=-0.55$ ,  $p=0.38$ ).
