# Supplementary material for: Raman spectroscopy detects metabolic signatures of radiation response and hypoxic fluctuations in non-small cell lung cancer
Source: BMC Cancer. 2019 May 20;19:474. doi: 10.1186/s12885-019-5686-1 (PMC6528330; doi:10.1186/s12885-019-5686-1)
Supplement: Supplementary file 1 — Table S1. Raman peak assignment for radiation induced principal component 1 (PC1). Table S2. Raman peak assignment for principal component 2 (PC2). Figure S1. Mean Raman spectrum obtained for unirradiated and irradiated tumours harvested at 2 hours and 3 days post treatment. Figure S2. PC2 score in relation to tumour regression. Figure S3. No correlation between PC2 score and CAIX IF intensity. (ZIP 2231 kb) [file 12885_2019_5686_MOESM1_ESM.zip › Suppl_TableS1R3.pdf]

Supplementary Table S.1: Raman peak assignment for radiation induced principal component 1 (PC1). Only main spectral contributors to the PC are listed.

| Assignment                         |                   |                   |                        |              |
|------------------------------------|-------------------|-------------------|------------------------|--------------|
| Raman Shift<br>(cm <sup>-1</sup> ) | Nucleic Acid      | Protein           | Lipid                  | Carbohydrate |
| 479                                |                   |                   |                        | glyc.        |
| 580                                |                   |                   |                        | glyc.        |
| 726                                | A[1]              |                   |                        |              |
| 784                                | C,U ring str. [2] |                   |                        |              |
| 810                                |                   |                   | O-P-O[3]               |              |
| 850                                |                   |                   |                        | glyc.        |
| 940                                |                   |                   |                        | glyc.        |
| 955-994                            | d.[4]             | C-C str.[4]       | C-C[3]                 |              |
| 1002                               |                   | phe. sym. rb.[3]  |                        |              |
| 1042                               |                   |                   |                        | glyc.        |
| 1082                               |                   |                   |                        | glyc.        |
| 1129                               |                   |                   |                        | glyc.        |
| 1178                               |                   | phe. ring str.[5] |                        |              |
|                                    |                   | tyr.[6]           |                        |              |
| 1249                               | T[4]              | am. III β[3]      |                        |              |
| 1297                               | A[7]              | CH def. [7]       | CH <sub>2</sub> tw.[3] |              |
| 1335                               |                   |                   |                        | glyc.        |
| 1382                               |                   |                   |                        | glyc.        |

| Assignment                         |              |            |            |              |
|------------------------------------|--------------|------------|------------|--------------|
| Raman Shift<br>(cm <sup>-1</sup> ) | Nucleic Acid | Protein    | Lipid      | Carbohydrate |
| 1442                               |              | CH def.[3] | CH def.[3] |              |
| 1659                               | T, C, G[4]   | am. I[4]   |            |              |

Glycogen (glyc), tyrosine (tyr), adenine (A), cytosine (C), uracil (U), stretch (str), deoxyribose (d), phenylalanine (phe), symmetric (sym), ring breathing (rb), vibration (vib), bending (bd), thymine (T), amide (am),  $\beta$  sheet ( $\beta$ ), deformation (def), twist (tw), guanine (G).

## References

- [1] Krafft C, Knetschke T, Siegner A, Funk RHW, Salzer R. Mapping of single cells by near infrared Raman microspectroscopy. *Vib Spectrosc* 2003;32:75–83. doi:10.1016/S0924-2031(03)00049-3.
- [2] Naumann D. FT-infrared and Raman spectroscopy in biomedical research. *Appl Spectrosc Rev* 2001;36:239–98.
- [3] Notingher I, Verrier S, Haque S, Polak JM, Hench LL. Spectroscopic study of human lung epithelial cells (A549) in culture: Living cells versus dead cells. *Biopolym - Biospectroscopy Sect* 2003;72:230–40. doi:10.1002/bip.10378.
- [4] Overman SA, Aubrey KL, Reilly KE, Osman O, Hayes SJ, Serwer P, et al. Conformation and interactions of the packaged double-stranded DNA genome of bacteriophage T7. *Biospectroscopy* 1998;4:S47–56. doi:10.1002/(SICI)1520-6343(1998)4:5+<S47::AID-BSPY6>3.0.CO;2-7.

- [5] Omberg KM, Osborn JC, Zhang SL, Freyer JP, Mourant JR, Schoonover JR. Raman spectroscopy and factor analysis of tumorigenic and non-tumorigenic cells. *Appl Spectrosc* 2002;56:813–9. doi:10.1366/000370202760171464.
- [6] Uzunbajakava N, Lenferink a., Kraan Y, Willekens B, Vrensen G, Greve J, et al. Nonresonant Raman imaging of protein distribution in single human cells. *Biopolym - Biospectroscopy Sect* 2003;72:1–9. doi:10.1002/bip.10246.
- [7] Puppels GJ, Garritsen HS, Segers-Nolten GM, de Mul FF, Greve J. Raman microspectroscopic approach to the study of human granulocytes. *Biophys J* 1991;60:1046–56. doi:10.1016/S0006-3495(91)82142-7.
