# Supplementary material for: Raman spectroscopy detects metabolic signatures of radiation response and hypoxic fluctuations in non-small cell lung cancer
Source: BMC Cancer. 2019 May 20;19:474. doi: 10.1186/s12885-019-5686-1 (PMC6528330; doi:10.1186/s12885-019-5686-1)
Supplement: Supplementary file 1 — Table S1. Raman peak assignment for radiation induced principal component 1 (PC1). Table S2. Raman peak assignment for principal component 2 (PC2). Figure S1. Mean Raman spectrum obtained for unirradiated and irradiated tumours harvested at 2 hours and 3 days post treatment. Figure S2. PC2 score in relation to tumour regression. Figure S3. No correlation between PC2 score and CAIX IF intensity. (ZIP 2231 kb) [file 12885_2019_5686_MOESM1_ESM.zip › Suppl_TableS2R3.pdf]

Supplementary Table S.2: Raman peak assignment for principal component 2 (PC2). Only main spectral contributors to the PC are listed.

| Raman Shift<br>(cm <sup>-1</sup> ) | Assignment                             |                                        |                        |              |
|------------------------------------|----------------------------------------|----------------------------------------|------------------------|--------------|
|                                    | Nucleic Acid                           | Protein                                | Lipid                  | Carbohydrate |
| 666                                | G, T[1,2]                              |                                        |                        |              |
| 714                                |                                        |                                        | cho.[1]<br>C-N str.[3] |              |
| 726                                | A[1]                                   |                                        |                        |              |
| 784                                | C, U[3]                                |                                        |                        |              |
| 855                                | O-P-O str.[4]                          | tyr. rb.[1]                            |                        |              |
| 927                                |                                        | C-C bk. α[5]                           |                        |              |
| 1004                               |                                        | phe. sym. rb.[1]                       |                        |              |
| 1071                               |                                        | C-N str.[4]                            | C-C str.[1]            |              |
| 1134                               |                                        | C-N str.[4]                            | C-C str.[1,4]          |              |
| 1178                               | DNA/RNA ring<br>vib.[6]                | phe. ring str.[6]<br>C-H bd. tyr.[4,6] |                        |              |
| 1235                               |                                        | am III rc.[4]                          |                        |              |
| 1272                               |                                        | am III α[4,5]                          |                        |              |
| 1297                               |                                        | am III α[4]                            | CH def.[4]             |              |
| 1338                               | CH <sub>3</sub> CH <sub>2</sub> wg.[3] |                                        |                        |              |
| 1373                               | T[1]<br>A, G[2]                        |                                        |                        |              |

| Assignment                         |              |            |                         |              |
|------------------------------------|--------------|------------|-------------------------|--------------|
| Raman Shift<br>(cm <sup>-1</sup> ) | Nucleic Acid | Protein    | Lipid                   | Carbohydrate |
| 1438                               |              |            | CH <sub>2</sub> def.[1] |              |
| 1577                               | A, G[1]      |            |                         |              |
| 1618                               |              | tyr.[7]    |                         |              |
|                                    |              | trp.[3]    |                         |              |
| 1659                               |              | am. I α[3] | C=C str.[3]             |              |
| 1682                               |              | am. I β[5] |                         |              |

Guanine (G), thymine (T), choline (cho), stretch (str), adenine (A), cytosine (C), uracil (U), tyrosine (tyr), ring breathing (r.b.), backbone (bk.),  $\alpha$  helix ( $\alpha$ ), phenylalanine (phe), symmetric (sym), vibration (vib), bending (bd), wagging (wg), deformation (def), tryptophan (trp), amide (am),  $\beta$  sheet ( $\beta$ ), random coil (rc).

## References

- [1] Krafft C, Knetschke T, Siegner A, Funk RHW, Salzer R. Mapping of single cells by near infrared Raman microspectroscopy. *Vib Spectrosc* 2003;32:75–83. doi:10.1016/S0924-2031(03)00049-3.
- [2] Overman SA, Aubrey KL, Reilly KE, Osman O, Hayes SJ, Serwer P, et al. Conformation and interactions of the packaged double-stranded DNA genome of bacteriophage T7. *Biospectroscopy* 1998;4:S47–56. doi:10.1002/(SICI)1520-6343(1998)4:5+<S47::AID-BSPY6>3.0.CO;2-7.

- [3] Stone N, Kendall C, Shepherd N, Crow P, Barr H. Near-infrared Raman spectroscopy for the classification of epithelial pre-cancers and cancers. *J Raman Spectrosc* 2002;33:564–73. doi:10.1002/jrs.882.
- [4] Notingher I, Verrier S, Haque S, Polak JM, Hench LL. Spectroscopic study of human lung epithelial cells (A549) in culture: Living cells versus dead cells. *Biopolym - Biospectroscopy Sect* 2003;72:230–40. doi:10.1002/bip.10378.
- [5] Synytsya A, Alexa P, Besserer J, De Boer J, Froschauer S, Gerlach R, et al. Raman spectroscopy of tissue samples irradiated by protons. *Int J Radiat Biol* 2004;80:581–91. doi:10.1080/09553000412331283515.
- [6] Omberg KM, Osborn JC, Zhang SL, Freyer JP, Maurant JR, Schoonover JR. Raman spectroscopy and factor analysis of tumorigenic and non-tumorigenic cells. *Appl Spectrosc* 2002;56:813–9. doi:10.1366/000370202760171464.
- [7] Naumann D. FT-infrared and Raman spectroscopy in biomedical research. *Appl Spectrosc Rev* 2001;36:239–98.
